# Supplementary material for: Zinc germanium nitrides and oxide nitrides: the influence of oxygen on electronic and structural properties
Source: Royal Society of Chemistry journal article supplement (doi:10.1039/d2fd00041e), 2022-01-01
Supplement: d2fd00041e1.pdf [file d2fd00041e1.pdf]

Supplementary Information

**Zinc Germanium Nitrides and Oxide Nitrides: The Influence of Oxygen on Electronic and Structural Properties.**

Joachim Breternitz, Susan Schorr

**1. DOS Figures ZnGeN<sub>2</sub>**

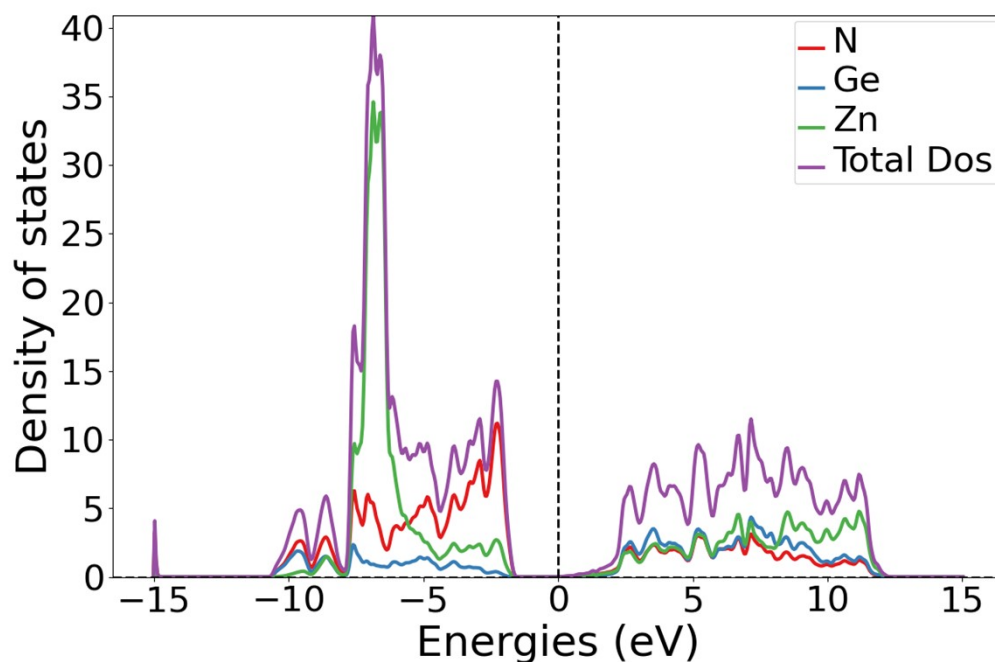

Figure S1: DOS of ZnGeN<sub>2</sub> with pDOS of the different atom types.

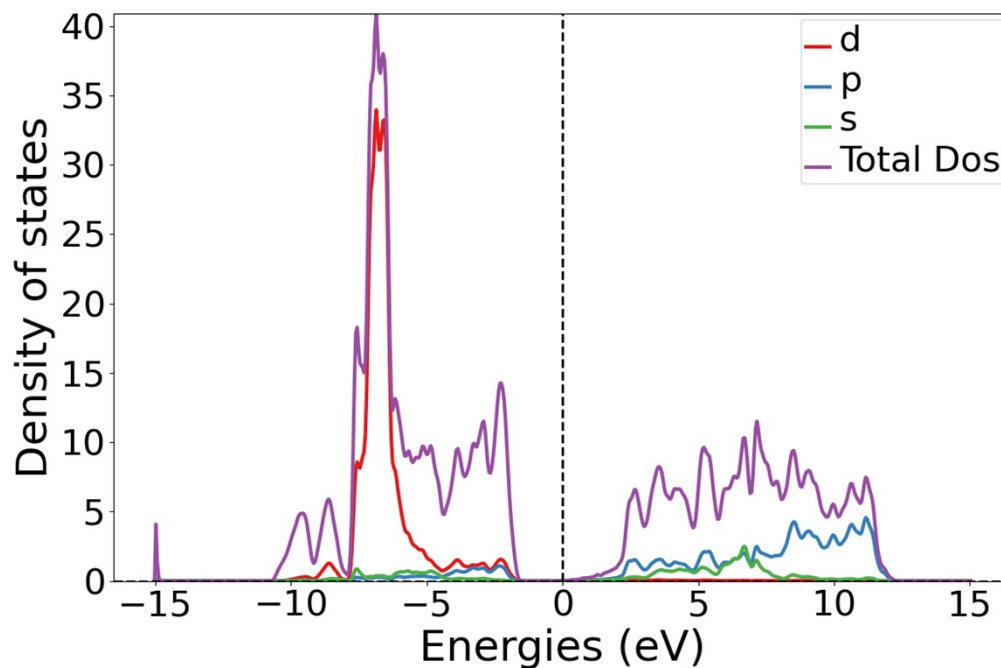

Figure S2: Orbital separated pDOS of the Zn orbitals

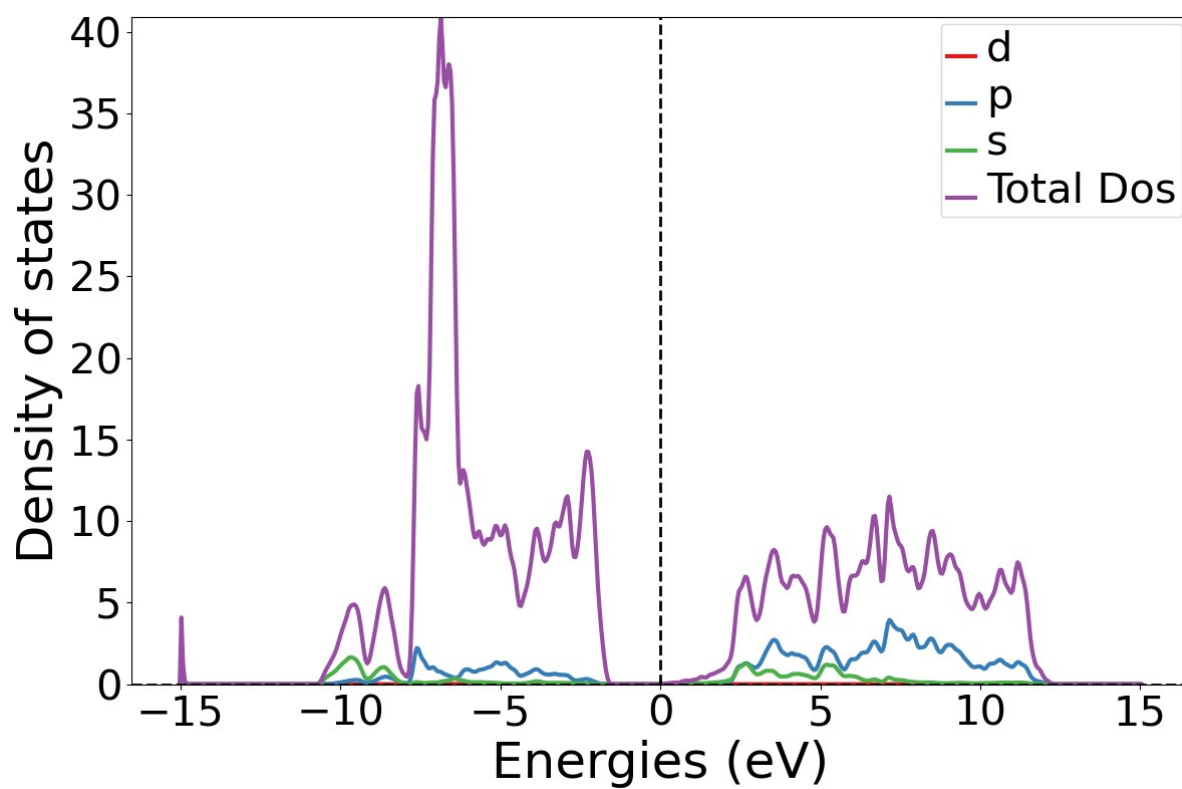

Figure S3: Orbital separated pDOS of the Ge orbitals

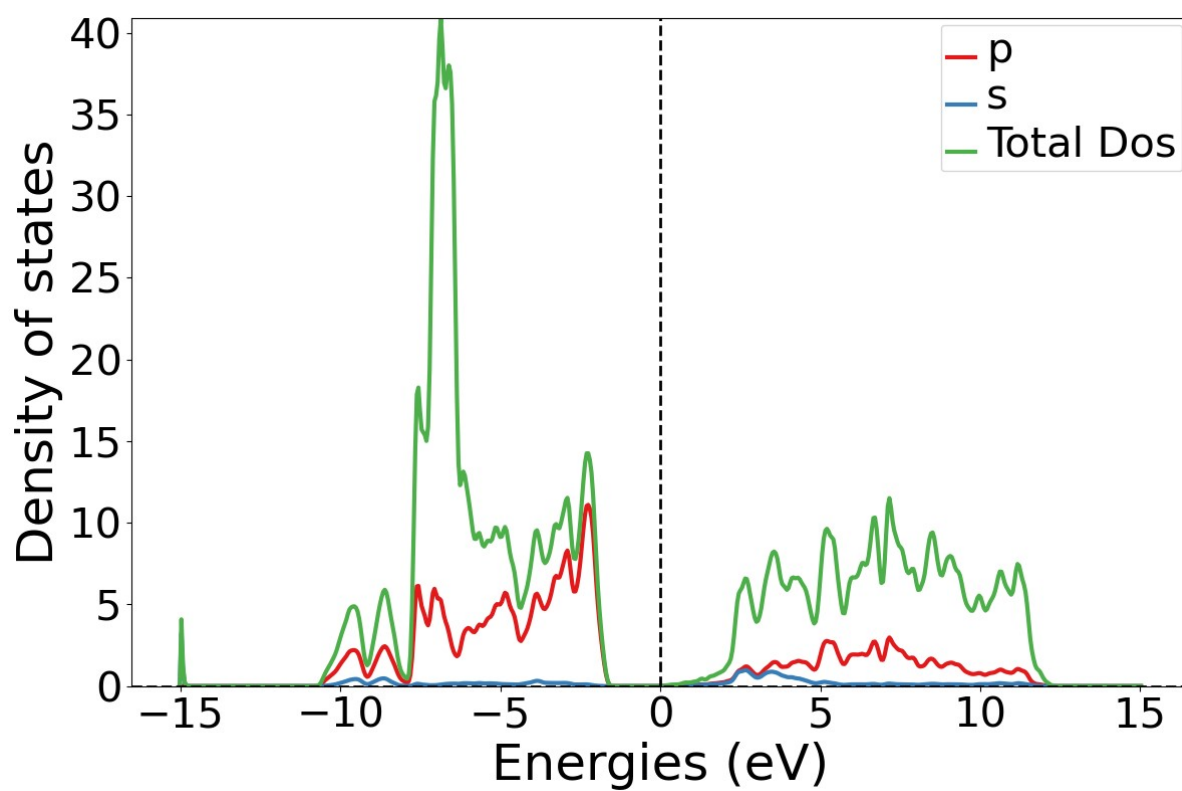

Figure S4: Orbital separated pDOS of the N orbitals

## 2. DOS of $\text{Zn}_{1.25}\text{Ge}_{0.75}(\text{N}_{0.75}\text{O}_{0.25})_2$ (a)

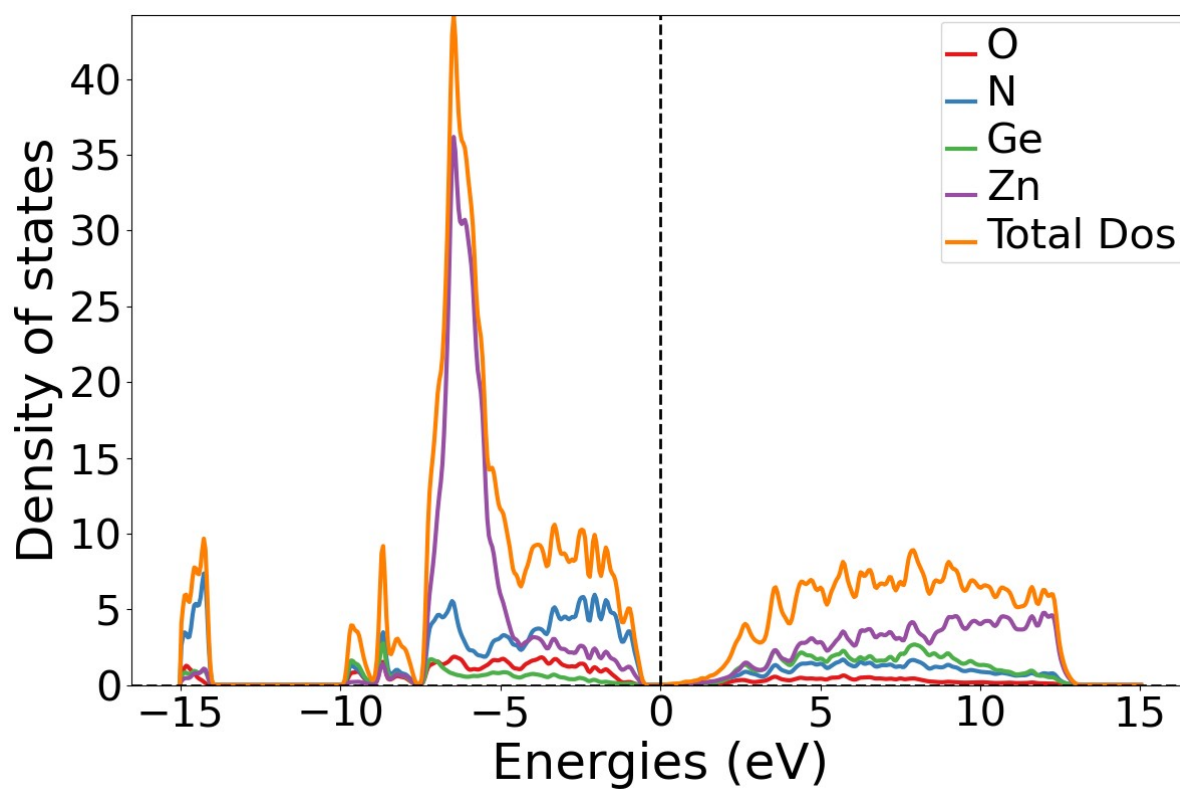

Figure S5: Total DOS with pDOS contributions of all atom types.

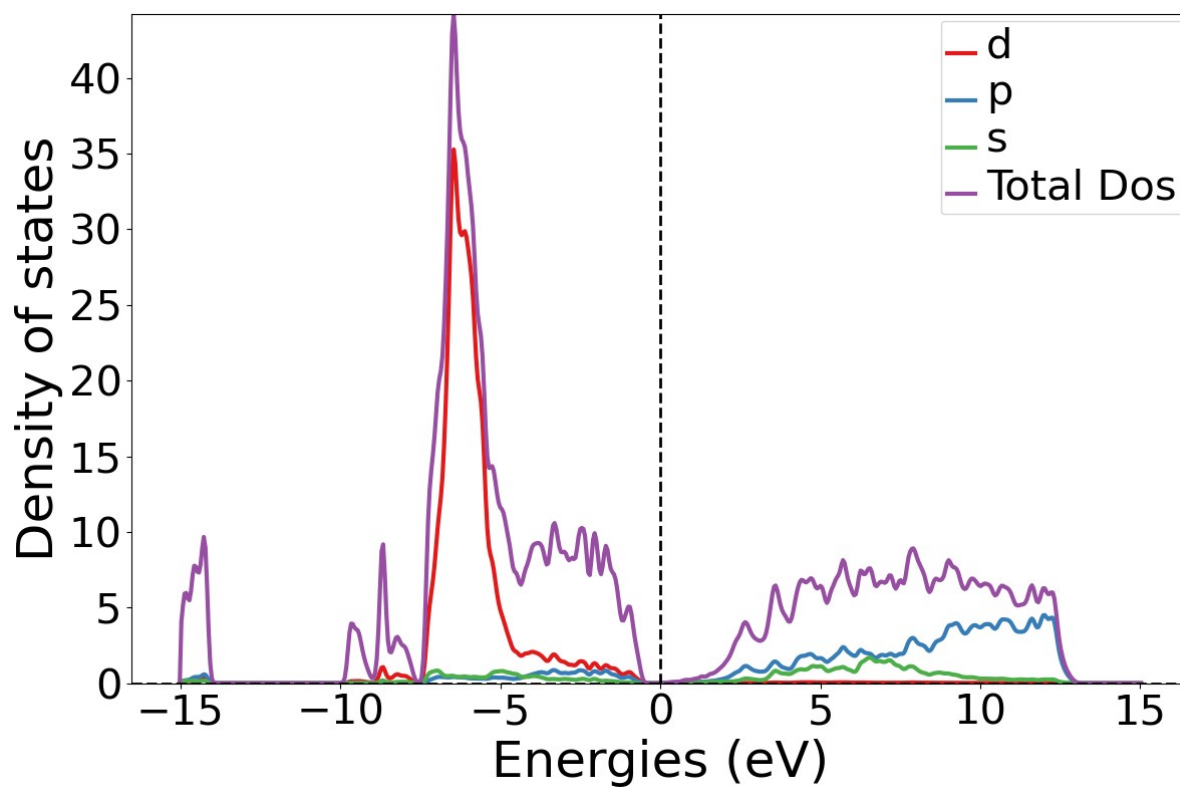

Figure S6: Orbital separated pDOS of the Zn orbitals

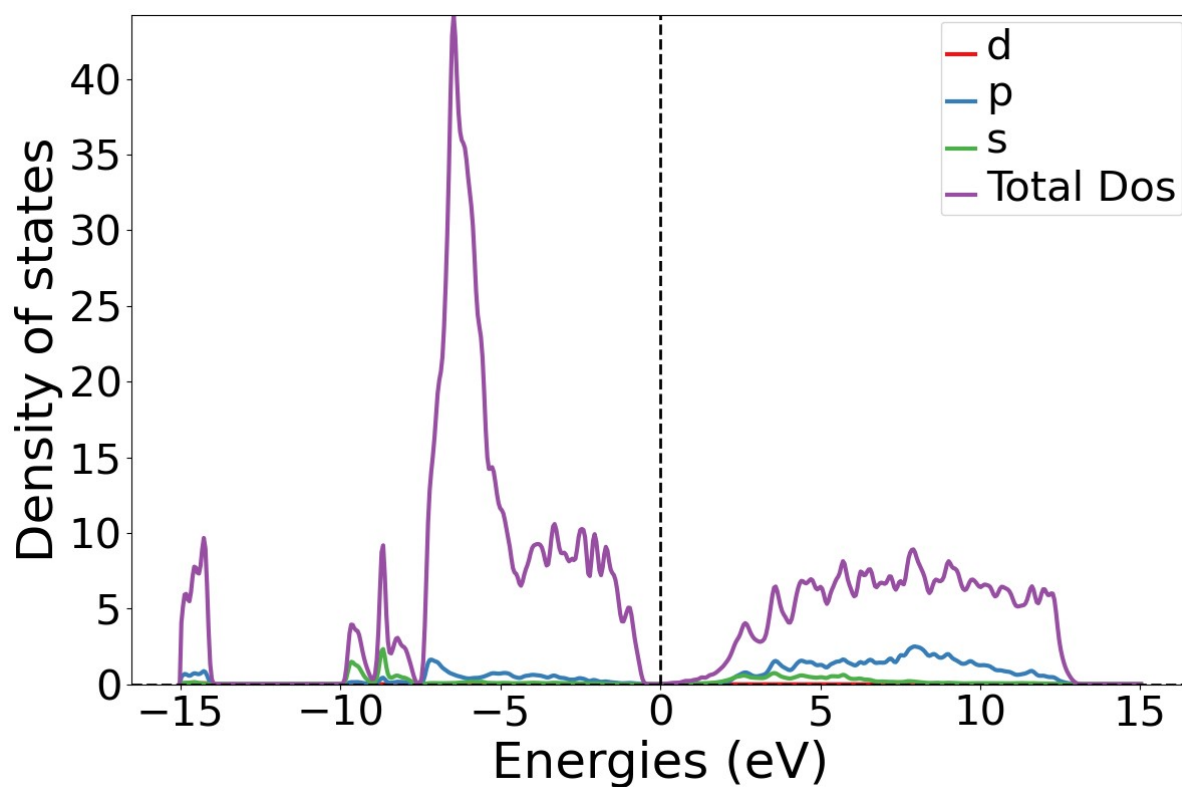

Figure S7: Orbital separated pDOS of the Ge orbitals

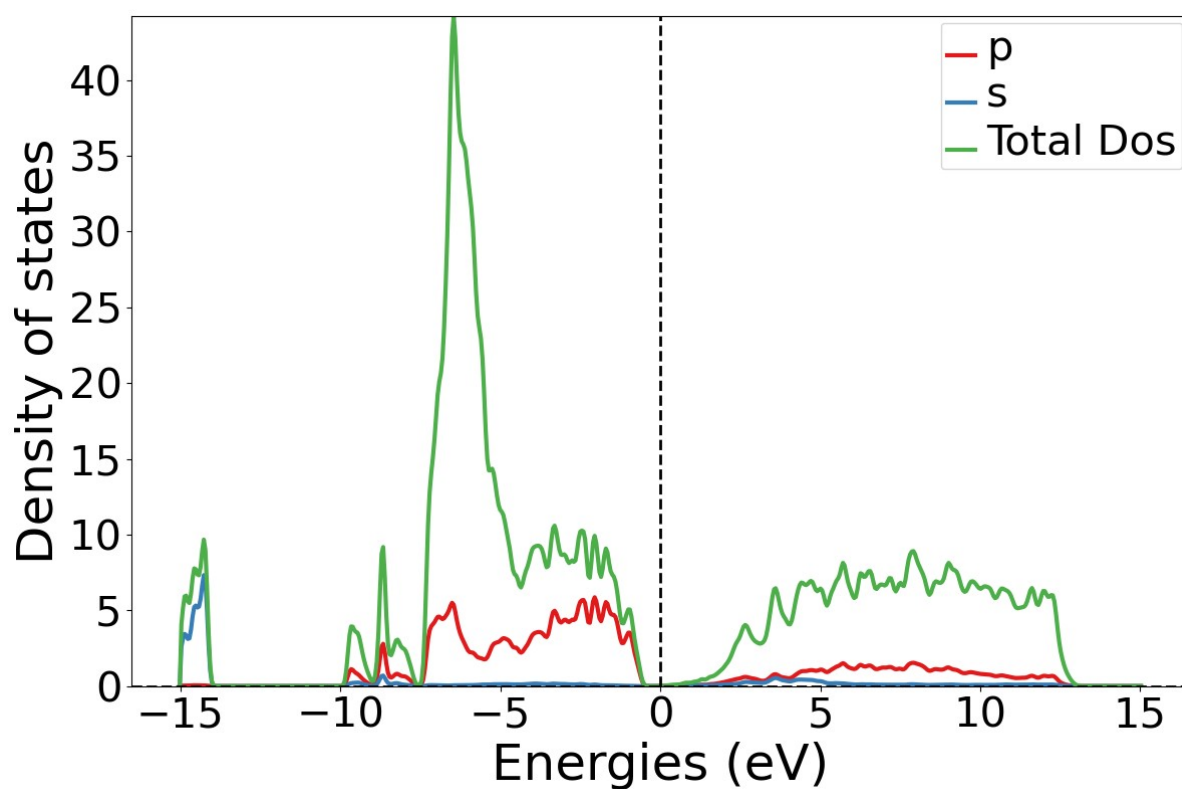

Figure S8: Orbital separated pDOS of the N orbitals

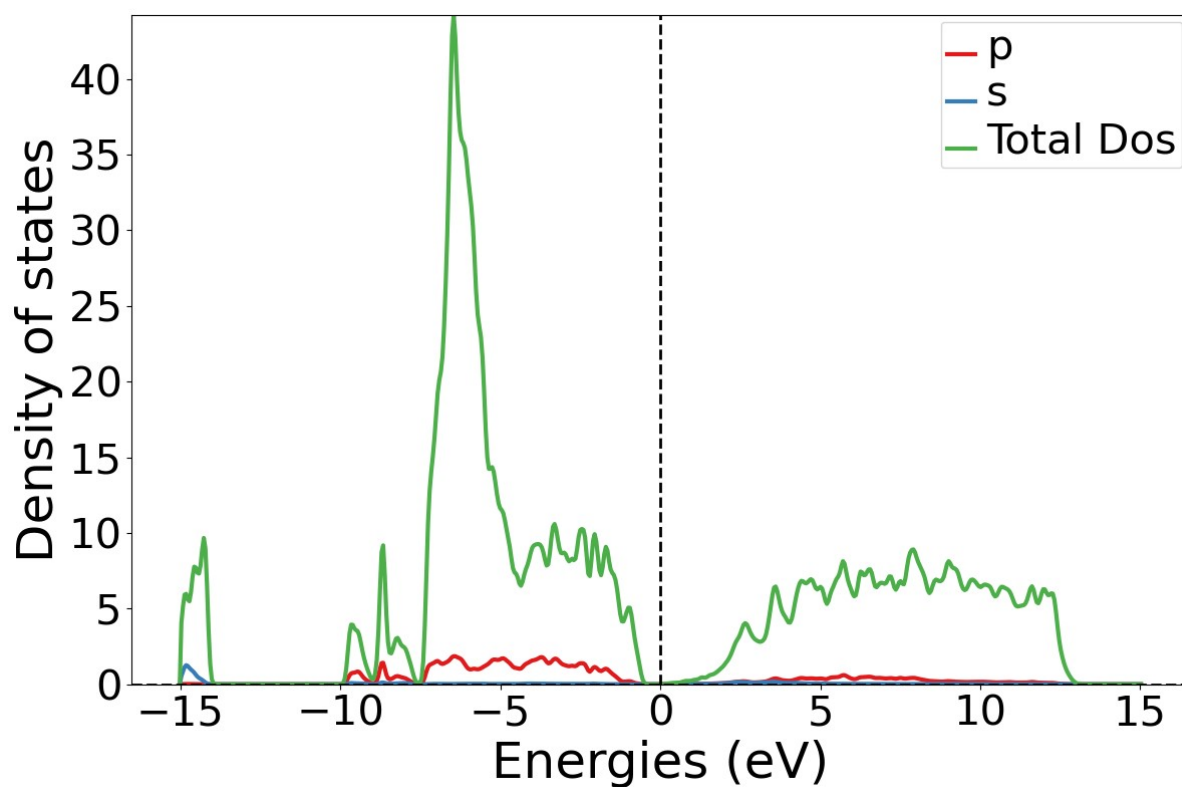

Figure S9: Orbital separated pDOS of the O orbitals

### 3. DOS of $\text{Zn}_{1.25}\text{Ge}_{0.75}(\text{N}_{0.75}\text{O}_{0.25})_2$ (b)

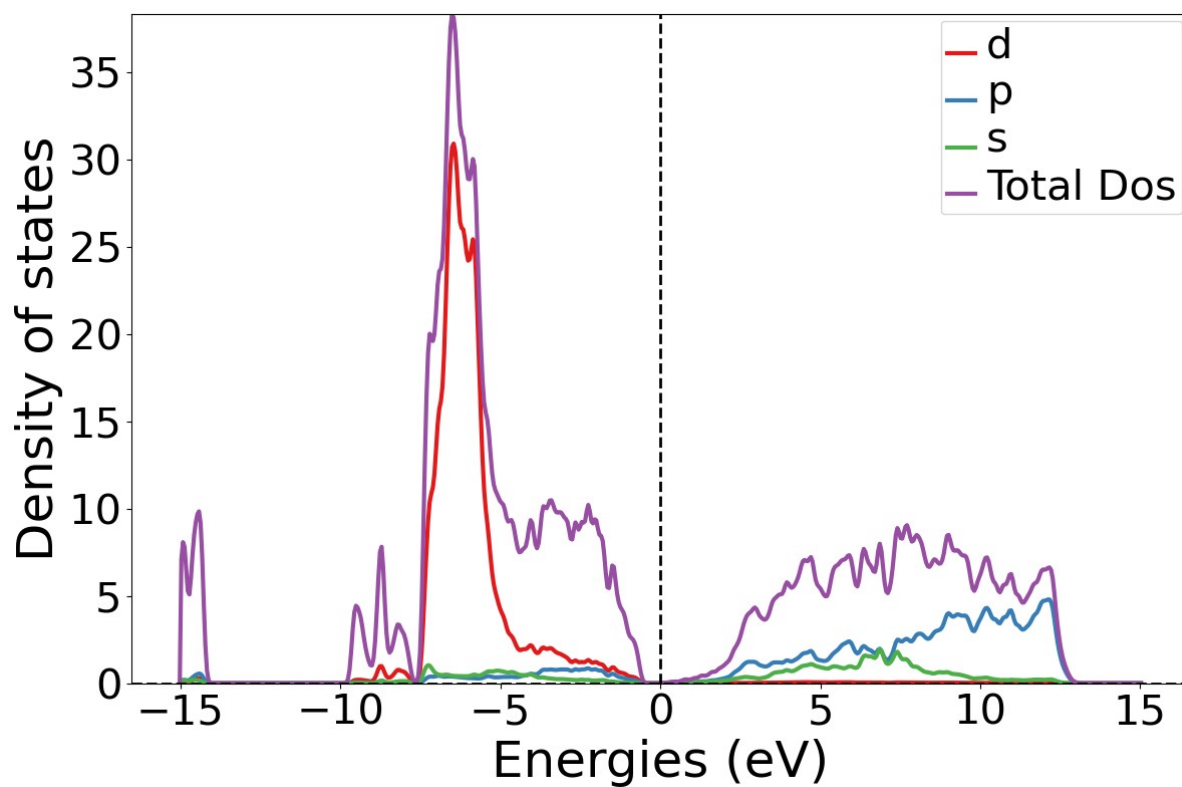

Figure S10: Orbital separated pDOS of the Zn orbitals

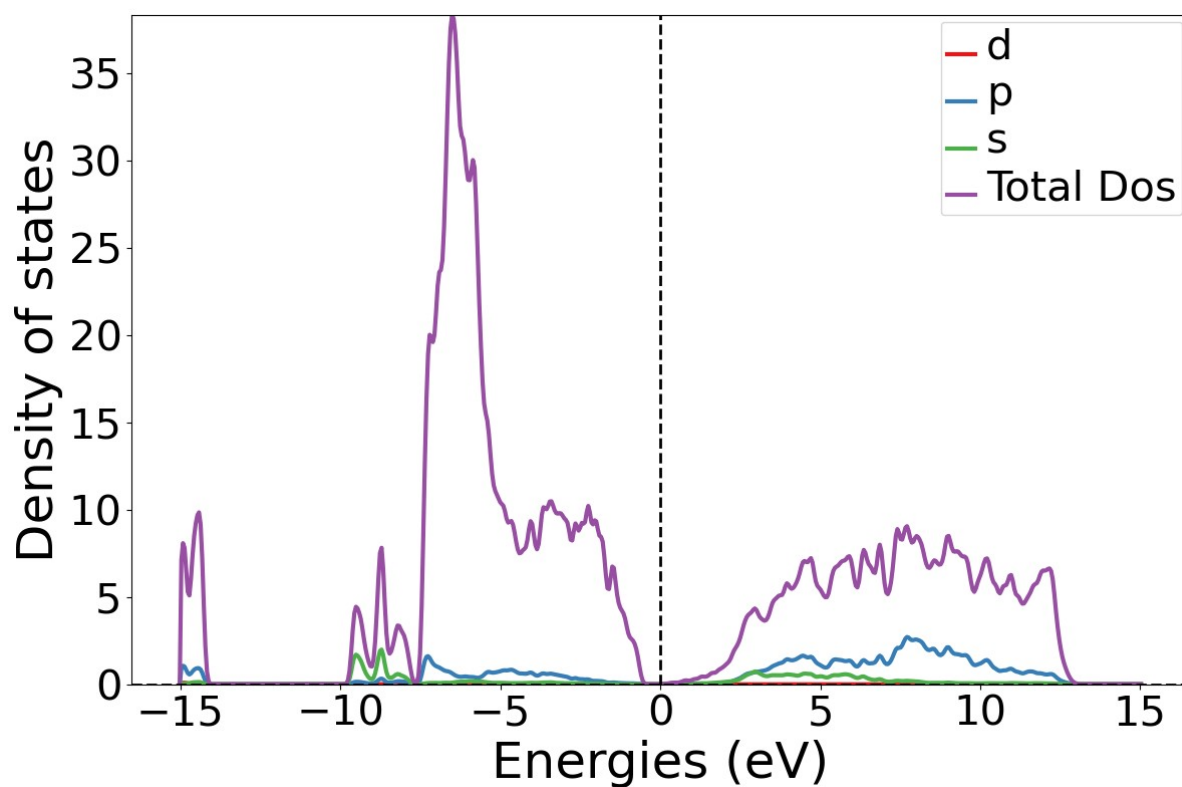

Figure S11: Orbital separated pDOS of the Ge orbitals

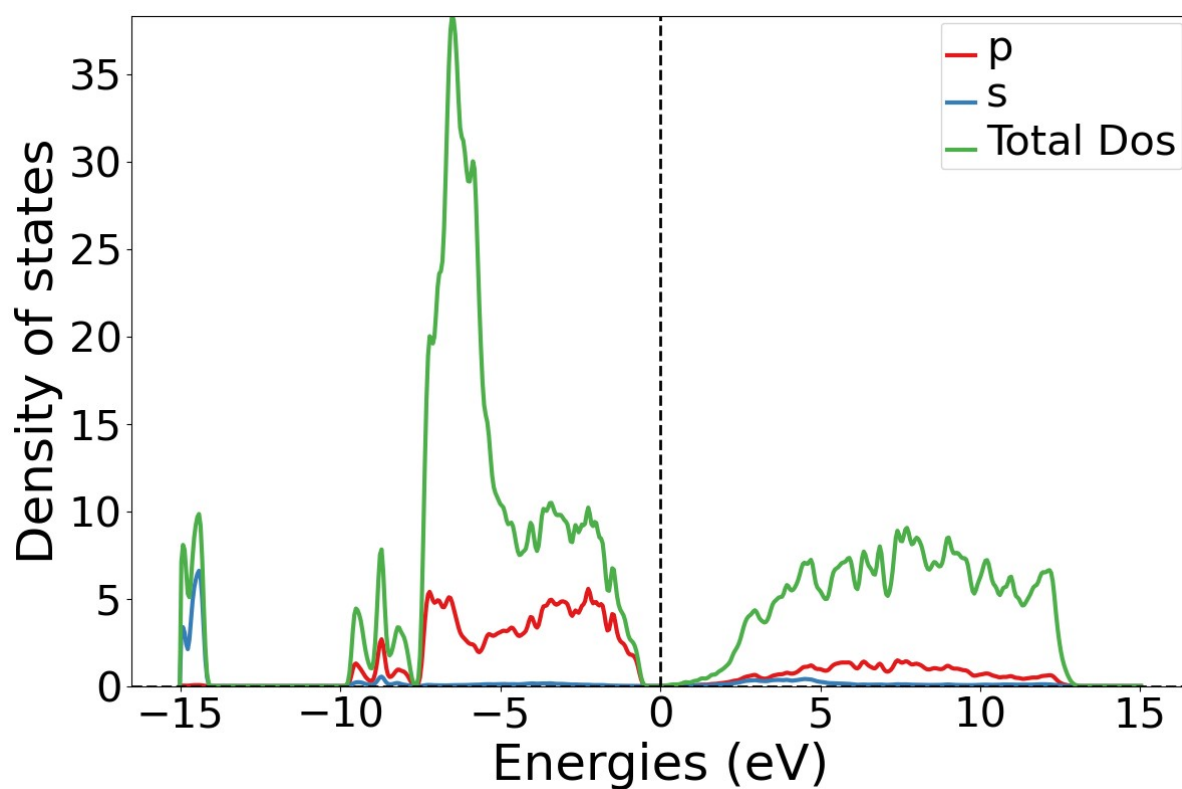

Figure S12: Orbital separated pDOS of the N orbitals

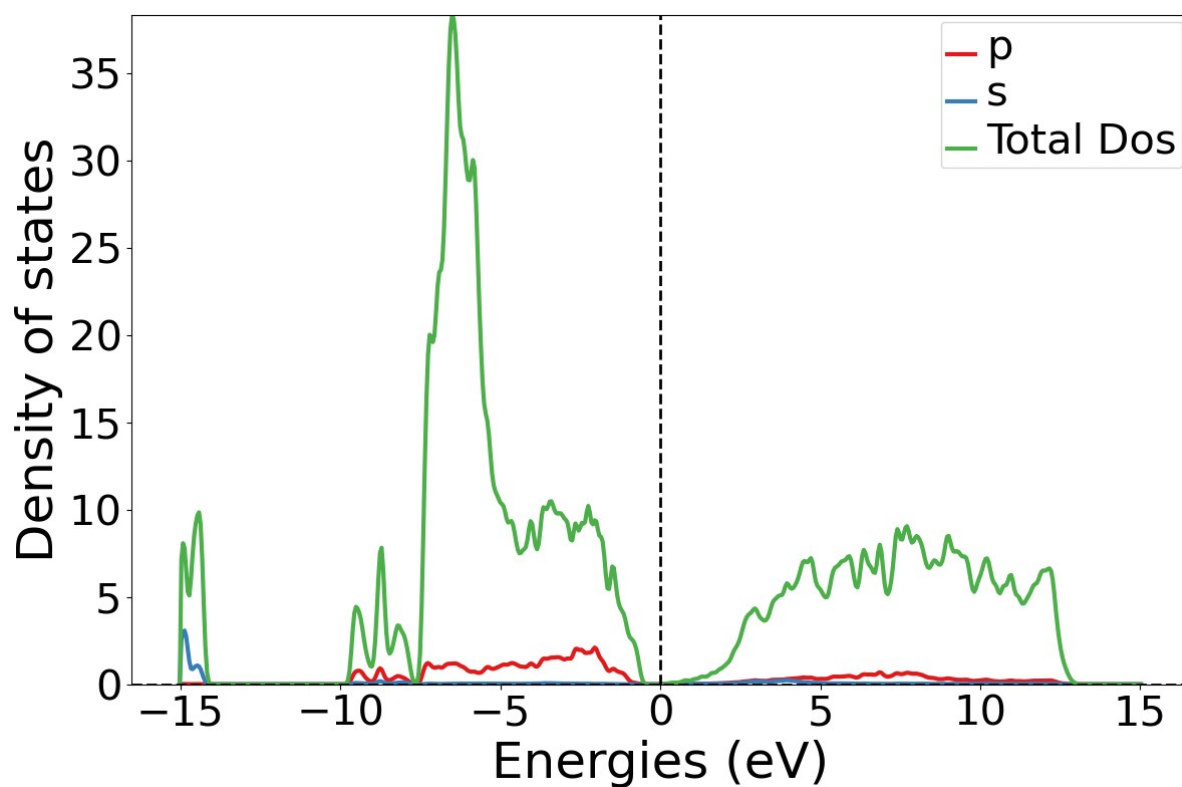

Figure S13: Orbital separated pDOS of the O orbitals

#### 4. COHP of $\text{Zn}_{1.25}\text{Ge}_{0.75}(\text{N}_{0.75}\text{O}_{0.25})_2$ (a)

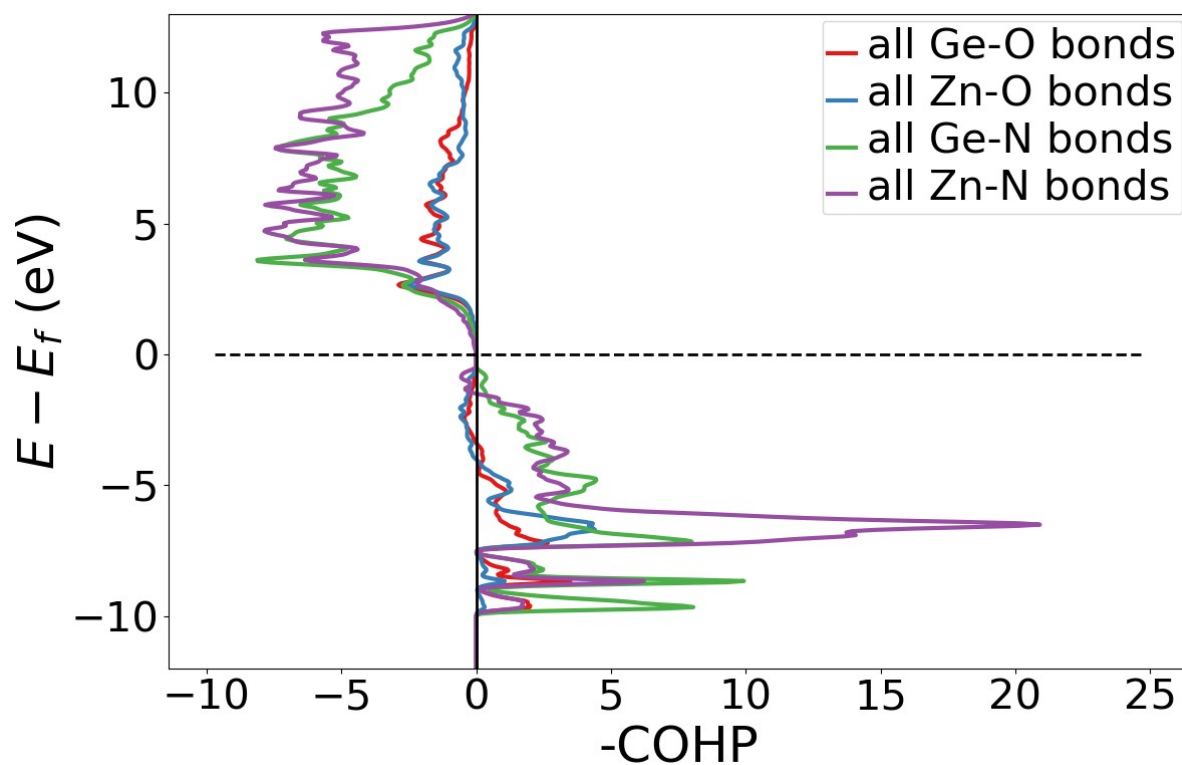

Figure S14: COHPs summed over the Ge-N, Zn-N, Ge-O and Zn-O bonds.
